# Supplementary material for: A label-free electrochemical aptasensor based on the core–shell Cu-MOF@TpBD hybrid nanoarchitecture for the sensitive detection of PDGF-BB
Source: Royal Society of Chemistry journal article supplement (doi:10.1039/d0an01885f), 2020-11-23
Supplement: d0an01885f1.pdf [file d0an01885f1.pdf]

## Supporting Information

### **Label-free electrochemical aptasensor based on the core-shell Cu-MOF@TpBD hybrid nanoarchitecture for the sensitive detection of PDGF-BB**

**Ya Li,<sup>a</sup> Zhiling Liu,<sup>a</sup> Wenbo Lu,<sup>a</sup> Man Zhao,<sup>a</sup> He Xiao,<sup>a</sup> Tianjun Hu,<sup>a</sup> Jianchun Ma,<sup>a</sup> Zhanfeng Zheng,<sup>b</sup> Jianfeng Jia<sup>\*a</sup> and Haishun Wu<sup>\*a</sup>**

<sup>a</sup>Key Laboratory of Magnetic Molecules and Magnetic Information Materials Ministry of Education, School of Chemical and Material Science, Shanxi Normal University, Linfen 041004, China

<sup>b</sup>State Key Laboratory of Coal Conversion, Institute of Coal Chemistry, Chinese Academy of Sciences

Corresponding authors

\*E-mail: [jiajf@dns.sxnu.edu.cn](mailto:jiajf@dns.sxnu.edu.cn)

\*E-mail: [wuhs@sxnu.edu.cn](mailto:wuhs@sxnu.edu.cn)

## **S1. Experimental section**

### **S1.1. Reagents and Materials**

1, 3, 5-triformylphloroglucinol (Tp) and mesitylene and benzidine (BD) were purchased from Energy Chemical (Shanghai, China). Copper (II) nitrate trihydrate ( $\text{Cu}(\text{NO}_3)_2 \cdot 3\text{H}_2\text{O}$ ) and acetic acid and dichloromethane (DCM) were purchased from Hushi Laboratorial Equipment Co. Ltd. (Shanghai, China). Gold chloride tetrahydrate ( $\text{HAuCl}_4 \cdot 4\text{H}_2\text{O}$ , 99.9%), acetone, and 1,4-dioxane were purchased from Sinopharm Chemical Reagent Co.Ltd. (Shanghai, China). Human mucin1 (MUC1) vascular endothelial growth factor (VEGF) and (platelet-derived growth factor-BB) PDGF-BB were purchased from Shanghai North Connaught Biotechnology Co, Ltd. (Shanghai, China). Human serum was provided by Linfen People's Hospital (Shanxi, China). 2-amino terephthalic acid ( $\text{NH}_2\text{-BDC}$ ) was provided by Bailingwei Chemical Technology Co. Ltd. (Beijing, China). N, N-dimethylformamide (DMF,  $\geq 99\%$ ) was provided by Aladdin (China). Polyvinylpyrrolidone (PVP,  $M_w = 40000 \text{ g} \cdot \text{mol}^{-1}$ ) was obtained from Stremchemical. Phosphate buffer solution (PBS, 0.1 M, pH 7.4) containing 0.1 M  $\text{Na}_2\text{HPO}_4$ , 0.1 M  $\text{KH}_2\text{PO}_4$ , and 0.1 M KCl was used as a working buffer for the performance examination of the electrodes. The ultra-pure water was used throughout the whole experiment. The sequences of PDGF-BB targeted aptamer is listed as follows: CAGGCTACGGCACGTAGAGCATCACCATGATCCTG.

### **S1.2. Apparatus**

Valuable information about the topographic characteristics of the synthetic nanomaterials was captured with the aid of JEOL JSM-7500F field emission scanning electron microscope (SEM) and JEOL JEM-2100 transmission electron microscope (TEM). The phase structure of the nanomaterials was analyzed using the Rigaku Ultima IV-185 room-temperature X-ray diffractometer (XRD) with filtered Cu  $K\alpha$  radiation. The comparative Fourier transformation infrared spectra (FTIR) were recorded with a Bruker Alpha FTIR spectrometer. The specific surface areas

and pore size distribution of all samples were measured by the method of Brunauer-Emmett-Teller (BET) using a Beishide 3H-2000PS2 instrument at the temperature of liquid nitrogen.

### **S1.3. Electrochemical detection**

The whole electrochemical measurements were conducted at room temperature with a CHI660E electrochemical workstation (Chenhua Instrument Company of Shanghai, China), which equips with a conventional three-electrode configuration consisting of a glassy carbon electrode (GCE, 4 mm in diameter), a saturated calomel electrode (SCE), and a platinum wire. The mixed solution comprising  $K_3[Fe(CN)_6]/K_4[Fe(CN)_6]$  (5 mM) and KCl (0.1 M) was utilized as the electrolyte solution for the cyclic voltammetry (CV) measurement. The sweeping rate of the CV measurements was  $50 \text{ mV}\cdot\text{s}^{-1}$ , which were carried out in the range between -0.2 and 0.6 V (vs. SCE). The target of PDGF-BB was examined by the differential pulse voltammetry (DPV) measurements, which were performed in the potential of -0.2–0.3 V (vs. SCE) with an amplitude of 50 mV and a pulse width of 0.05 s.

### **S1.4. Theoretical calculations**

To qualitatively understand the weak interactions between the TpBD and aptamer, the model of TpBD-aptamer complex was set up and then further theoretically optimized with xTB program.<sup>1, 2</sup> The obtained molden file was used for the wavefunction analyses, which were finished by using Multiwfn program.<sup>3</sup> The Independent Gradient Model (IGM)<sup>4</sup> was employed for the visually studying inter-fragment interactions between TpBD and truncated PDGF-BB targeted aptamer. The color-coded isosurface images of IGM were rendered and visualized by the VMD program.<sup>5</sup>

## **References**

1. S. Grimme, C. Bannwarth and P. Shushkov, A Robust and Accurate Tight-Binding Quantum Chemical Method for Structures, Vibrational Frequencies, and Noncovalent Interactions of Large Molecular Systems Parametrized for All spd-Block Elements ( $Z = 1-86$ ), *J. Chem. Theory*

*Comput.*, 2017, **13**, 1989.

2. C. Bannwarth, S. Ehlert and S. Grimme, GFN2-xTB—An Accurate and Broadly Parametrized Self-Consistent Tight-Binding Quantum Chemical Method with Multipole Electrostatics and Density-Dependent Dispersion Contributions, *J. Chem. Theory Comput.*, 2019, **15**, 1652.
3. T. Lu and F. W. Chen, Multiwfn: A Multifunctional Wavefunction Analyzer, *J. Comput. Chem.*, 2012, **33**, 580.
4. C. Lefebvre, G. Rubez, H. Khartabil, J.-C. Boisson, J. Contreras-García and E. Hénon, Accurately Extracting the Signature of Intermolecular Interactions Present in the NCI Plot of the Reduced Density Gradient versus Electron Density, *Phys. Chem. Chem. Phys.*, 2017, **19**, 17928.
5. W. Humphrey, A. Dalke and K. Schulten, VMD: Visual Molecular Dynamics, *J. Mol. Graphics.*, 1996, **14**, 33.

**Table S1** Comparison of different approaches in analyzing PDGF-BB.

| Method                                 | Detection range                              | Detection limit           | Source    |
|----------------------------------------|----------------------------------------------|---------------------------|-----------|
| Electrochemical impedance spectroscopy | 0.001–0.05 ng·mL <sup>-1</sup>               | 0.82 pg·mL <sup>-1</sup>  | ref. 6    |
| Electrochemical impedance spectroscopy | 0.01–100 ng·mL <sup>-1</sup>                 | 3.7 pg·mL <sup>-1</sup>   | ref. 7    |
| Differential pulse voltammetry         | 0.005–1000 ng·mL <sup>-1</sup>               | 1.6 pg·mL <sup>-1</sup>   | ref. 8    |
| Biolayer interferometry                | 0.5–1000 ng·mL <sup>-1</sup>                 | 80 pg·mL <sup>-1</sup>    | ref. 9    |
| ELISA                                  | 0.00206–1.5 ng·mL <sup>-1</sup>              | 2.1 pg·mL <sup>-1</sup>   | abcam     |
| Differential pulse voltammetry         | 0.0001–0.5 and 0.5–60<br>ng·mL <sup>-1</sup> | 0.034 pg·mL <sup>-1</sup> | This work |

6. Z. Zhang, C. Guo, S. Zhang, L. He, M. Wang, D. Peng, J. Tian and S. Fang, Carbon-based nanocomposites with aptamer-templated silver nanoclusters for the highly sensitive and selective detection of platelet-derived growth factor, *Biosens. Bioelectron.*, 2017, **89**, 735.

7. L. He, S. Zhang, H. Ji, M. Wang, D. Peng, F. Yan, S. Fang, H. Zhang, C. Jia and Z. Zhang,

Protein-templated cobaltous phosphate nanocomposites for the highly sensitive and selective detection of platelet-derived growth factor-BB, *Biosens. Bioelectron.*, 2016, **79**, 553.

8. W. Song, H. Li, H. Liang, W. Qiang and D. Xu, Disposable Electrochemical Aptasensor Array by Using in Situ DNA Hybridization Inducing Silver Nanoparticles Aggregate for Signal Amplification, *Anal. Chem.*, 2014, **86**, 2775.

9. S. Gao, X. Zheng and J. Wu, A bilayer interferometry-based enzyme-linked aptamer sorbent assay for real-time and highly sensitive detection of PDGF-BB, *Biosens. Bioelectron.*, 2018, **102**, 57.

**Table S2** Detection of PDGF-BB added in human serum ( $n = 6$ ).

| Samples | Added PDGF-BB (ng·mL <sup>-1</sup> ) | Found PDGF-BB (ng·mL <sup>-1</sup> ) | Recovery (%) | RSD (%) |
|---------|--------------------------------------|--------------------------------------|--------------|---------|
| 1       | 0.0001                               | 0.000091                             | 91.0         | 4.3     |
| 2       | 0.5                                  | 0.487                                | 97.4         | 3.8     |
| 3       | 5                                    | 5.395                                | 107.9        | 2.9     |
| 4       | 20                                   | 18.62                                | 93.1         | 3.7     |
| 5       | 40                                   | 39.35                                | 98.4         | 4.5     |

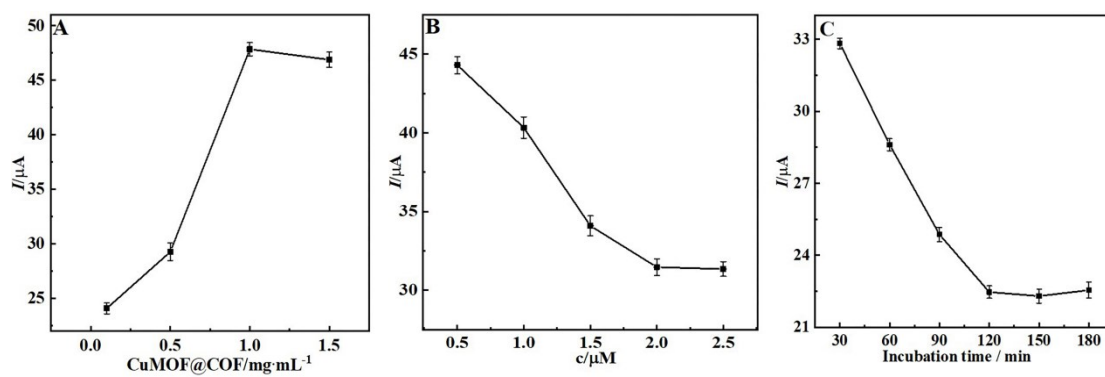

**Fig. S1** The current responses of (A) DpAu/GCE electrode incubated with different concentrations Cu-MOF@TpBD, (B) Cu-MOF@TpBD/DpAu/GCE electrode incubated with different concentration of aptamers. (C) the amperometric response of aptasensor as the function of the incubation time when immune-reacted with 500  $\text{pg mL}^{-1}$  PDGF-BB. The standard deviations of the mean are indicated as error bars, with the determination of 4 ( $n = 4$ ).

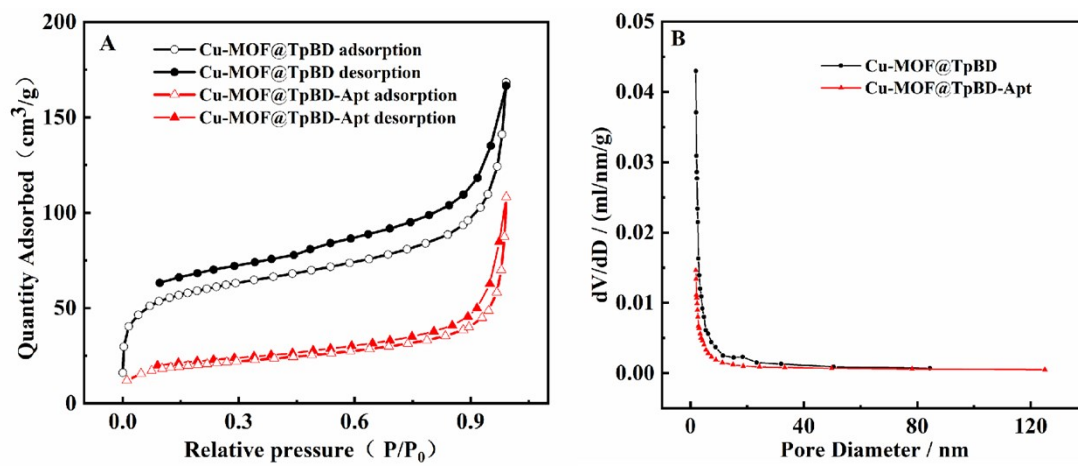

**Fig. S2**  $N_2$  adsorption-desorption isotherms (A) and the corresponding pore-size distribution curves (B) of the samples Cu-MOF@TpBD and Cu-MOF@TpBD-Apt.
